# Supplementary material
Source: Springer Nature journal article supplement (https://www.springermedizin.de/resource/supplementary/12916_2012_759_MOESM1_ESM.pdf/9598238)
Supplement: MOESM1 [file 9598238]

**Additional File 1:** List and detailed information of patient- and control cohorts used in the study.

| No. | Age | Gender | Subcutaneous NF | Cutaneous NF | PNF  | MPNST | Tumor volume (cm <sup>3</sup> ) |
|-----|-----|--------|-----------------|--------------|------|-------|---------------------------------|
| 1   | 20  | f      | none            | none         | 1    |       | 0                               |
| 2   | 30  | f      | none            | 100          | none |       | 0                               |
| 3   | 40  | f      | 3-9             | 3-9          | none |       | 0                               |
| 4   | 41  | f      | 3 to 9          | none         | none |       | 0                               |
| 5   | 32  | f      | none            | 10-50        | none |       | 0                               |
| 6   | 29  | m      | 600             | none         | none |       | 0                               |
| 7   | 39  | f      | 100             | 1000         | >2   |       | 0                               |
| 8   | 15  | m      | 60              | 10-50        | 2    |       | 0                               |
| 9   | 26  | m      | 10-50           | 150          | 1    |       | 0                               |
| 10  | 22  | m      | 2               | none         | none | y     | 0                               |
| 11  | 26  | f      | 2               | 10-50        | none |       | 0                               |
| 12  | 36  | m      | 10-50           | 10-50        | none |       | 0                               |
| 13  | 9   | m      | none            | none         | none |       | 0                               |
| 14  | 21  | f      | 10 to 50        | 2            | none |       | 0                               |
| 15  | 39  | f      | none            | 10 to 50     | 2    |       | 0                               |
| 16  | 34  | m      | 10-50           | 10-50        | none |       | 0                               |
| 17  | 25  | m      | 3-9             | 3-9          | 1    |       | 0                               |
| 18  | 15  | m      | none            | none         | none |       | 0                               |
| 19  | 48  | f      | none            | none         | none |       | 0                               |
| 20  | 15  | f      | 10-50           | none         | none | y     | 0                               |
| 21  | 61  | m      | none            | 250          | 2    |       | 0                               |
| 22  | 21  | f      | 1000            | 10-50        | none |       | 0                               |
| 23  | 40  | f      | none            | 10 to 50     | none |       | 0                               |
| 24  | 21  | f      | none            | none         | 1    |       | 0                               |
| 25  | 31  | f      | none            | none         | none |       | 0                               |
| 26  | 51  | m      | 10 to 50        | 250          | 1    |       | 0                               |
| 27  | 38  | f      | 10 to 50        | none         | none |       | 0                               |
| 28  | 45  | m      | none            | 800          | none |       | 0                               |
| 29  | 18  | m      | none            | none         | none |       | nd                              |
| 30  | 42  | m      | 3 to 9          | 10 to 50     | none |       | 1-99                            |
| 31  | 29  | m      | none            | none         | >2   |       | 1-100                           |
| 32  | 52  | m      | 10 to 50        | 10 to 50     | 1    |       | 50-500                          |
| 33  | 63  | f      | 10-50           | 1000         | 1    |       | 1-99                            |
| 34  | 43  | f      | none            | 100          | none |       | nd                              |
| 35  | 15  | m      | 200             | 3 to 9       | 1    |       | 1-99                            |
| 36  | 25  | f      | 10-50           | 3-9          | >2   |       | 1-99                            |
| 37  | 19  | m      | 2               | 10 to 50     | 1    |       | 1-99                            |
| 38  | 36  | m      | none            | 150          | none |       | nd                              |
| 39  | 30  | m      | 10-50           | none         | none | y     | 1-99                            |
| 40  | 43  | m      | 10-50           | 10-50        | 1    |       | 1-99                            |
| 41  | 3   | m      | 10 to 50        | 10 to 50     | 1    |       | 1-99                            |
| 42  | 44  | m      | 100             | 3000         | none |       | 1-99                            |
| 43  | 62  | f      | 3 to 9          | 500          | 2    |       | 1-99                            |

|    |    |   |          |          |      |   |         |
|----|----|---|----------|----------|------|---|---------|
| 44 | 18 | f | 10-50    | none     | none |   | 1-99    |
| 45 | 24 | m | 10-50    | none     | 2    |   | 1-99    |
| 46 | 30 | f | none     | 10-50    | none |   | nd      |
| 47 | 40 | m | none     | 10-50    | 1    | y | 1-99    |
| 48 | 40 | m | 70       | 100      | 1    |   | 1-99    |
| 49 | 22 | f | 10-50    | 3 to 9   | 2    |   | 1-99    |
| 50 | 46 | m | 10 to 50 | 400      | >2   |   | 1-99    |
| 51 | 18 | f | 2        | none     | >2   | y | 1-99    |
| 52 | 14 | m | none     | 10-50    | none |   | nd      |
| 53 | 35 | f | 3-9      | none     | none | y | 100-500 |
| 54 | 9  | f | 10-50    | 2        | 1    | y | 100-500 |
| 55 | 29 | f | 120      | 1000     | none | y | >500    |
| 56 | 30 | f | 10 to 50 | 200      | >2   |   | 100-500 |
| 57 | 28 | m | 10-50    | 3-9      | none | y | 100-500 |
| 58 | 29 | f | 200      | 400      | 2    | y | >500    |
| 59 | 36 | m | none     | none     | none |   | nd      |
| 60 | 37 | m | 10 to 50 | 1000     | >2   | y | 100-500 |
| 61 | 20 | f | 10 to 50 | 3 to 9   | 1    |   | 100-500 |
| 62 | 40 | m | 150      | 10 to 50 | >2   | y | 100-500 |
| 63 | 26 | f | 3-9      | 10-50    | 2    | y | 100-500 |
| 64 | 44 | f | 60       | 10 to 50 | none |   | 100-500 |
| 65 | 29 | f | 10 to 50 | 10-50    | none | y | 100-500 |
| 66 | 25 | f | 3 to 9   | 10 to 50 | 1    |   | 100-500 |
| 67 | 39 | m | none     | 3-9      | 1    |   | 100-500 |
| 68 | 26 | m | 1200     | 100      | 2    | y | >500    |
| 69 | 40 | f | 70       | 2000     | >2   |   | 100-500 |
| 70 | 41 | m | 100      | 3-9      | >2   | y | 100-500 |
| 71 | 63 | f | 10 to 50 | 200      | >2   | y | 100-500 |
| 72 | 51 | m | none     | 1000     | >2   | y | 100-500 |
| 73 | 31 | f | 1000     | 1000     | >2   |   | 100-500 |
| 74 | 60 | m | 3-9      | 300      | 1    | y | 100-500 |
| 75 | 39 | f | 100      | 300      | 1    | y | 100-500 |
| 76 | 30 | f | none     | 3-9      | 2    |   | 100-500 |
| 77 | 17 | m | 1000     | 500      | 1    | y | >500    |
| 78 | 17 | m | 2000     | none     | none | y | >500    |
| 79 | 51 | m | 60       | 10-50    | >2   | y | >500    |
| 80 | 27 | f | 700      | none     | 2    | y | >500    |
| 81 | 18 | m | 3 to 9   | 2        | 1    |   | >500    |
| 82 | 26 | f | 10 to 50 | 800      | 1    | y | >500    |
| 83 | 18 | f | 10-50    | 10-50    | 2    |   | >500    |
| 84 | 22 | m | 3-9      | 3-9      | 1    | y | >500    |
| 85 | 15 | f | 3 to 9   | 3 to 9   | 2    | y | >500    |
| 86 | 38 | m | 3 to 9   | none     | >2   | y | >500    |
| 87 | 37 | m | 10-50    | 200      | >2   |   | >500    |
| 88 | 45 | f | 100      | 3000     | 2    | y | >500    |
| 89 | 23 | m | 2000     | 1000     | >2   |   | >500    |
| 90 | 16 | f | 2        | 10 to 50 | 2    |   | nd      |

|                       |    |   |        |          |      |   |         |
|-----------------------|----|---|--------|----------|------|---|---------|
| 91                    | 45 | f | none   | >50      | 1    |   | nd      |
| 92                    | 32 | f | none   | 1000     | 1    |   | nd      |
| 93                    | 16 | m | none   | 3 to 9   | >2   |   | nd      |
| 94                    | 40 | f | 60     | 250      | 1    |   | nd      |
| 95                    | 13 | m | 2      | none     | 2    |   | nd      |
| 96                    | 32 | f | 3 to 9 | none     | none |   | nd      |
| 97                    | 28 | f | 10-50  | 100      | >2   |   | nd      |
| 98                    | 41 | f | none   | >50      | none |   | nd      |
| 99                    | 45 | m | 10-50  | 100      | none |   | nd      |
| 100                   | 50 | m | 3-9    | none     | none |   | nd      |
| 101                   | 20 | f | 2      | 2        | none |   | 1-99    |
| 102                   | 32 | m | 3-9    | none     | none |   | 0       |
| 103                   | 25 | m | none   | 3-9      | none |   | 0       |
| 104                   | 23 | m | none   | 10 to 50 | >2   | y | 100-500 |
| Healthy Control Group |    |   |        |          |      |   |         |
| 1                     | 53 | w |        |          |      |   |         |
| 2                     | 48 | w |        |          |      |   |         |
| 3                     | 48 | w |        |          |      |   |         |
| 4                     | 47 | w |        |          |      |   |         |
| 5                     | 42 | w |        |          |      |   |         |
| 6                     | 64 | w |        |          |      |   |         |
| 7                     | 44 | w |        |          |      |   |         |
| 8                     | 28 | w |        |          |      |   |         |
| 9                     | 73 | w |        |          |      |   |         |
| 10                    | 24 | w |        |          |      |   |         |
| 11                    | 67 | m |        |          |      |   |         |
| 12                    | 37 | m |        |          |      |   |         |
| 13                    | 58 | m |        |          |      |   |         |
| 14                    | 53 | m |        |          |      |   |         |
| 15                    | 25 | m |        |          |      |   |         |
| 16                    | 28 | m |        |          |      |   |         |
| 17                    | 29 | m |        |          |      |   |         |
| 18                    | 28 | m |        |          |      |   |         |
| 19                    | 38 | m |        |          |      |   |         |
| 20                    | 38 | m |        |          |      |   |         |
| 21                    | 41 | w |        |          |      |   |         |
| 22                    | 63 | w |        |          |      |   |         |
| 23                    | 66 | w |        |          |      |   |         |
| 24                    | 39 | w |        |          |      |   |         |
| 25                    | 47 | w |        |          |      |   |         |
| 26                    | 63 | w |        |          |      |   |         |
| 27                    | 61 | w |        |          |      |   |         |
| 28                    | 30 | w |        |          |      |   |         |
| 29                    | 34 | w |        |          |      |   |         |
| 30                    | 28 | w |        |          |      |   |         |
| 31                    | 56 | w |        |          |      |   |         |
| 32                    | 60 | w |        |          |      |   |         |

|    |    |   |  |  |  |  |  |
|----|----|---|--|--|--|--|--|
| 33 | 40 | m |  |  |  |  |  |
| 34 | 61 | m |  |  |  |  |  |
| 35 | 55 | m |  |  |  |  |  |
| 36 | 33 | m |  |  |  |  |  |
| 37 | 31 | m |  |  |  |  |  |
| 38 | 56 | m |  |  |  |  |  |
| 39 | 57 | m |  |  |  |  |  |
| 40 | 64 | m |  |  |  |  |  |
| 41 | 57 | m |  |  |  |  |  |
